# Supplementary material for: Identification of cancer prognosis-associated functional modules using differential co-expression networks
Source: PubMed Central journal article supplement (PMC5762563; doi:10.18632/oncotarget.22878), 2017-12-04
Supplement: oncotarget-08-112928-s001.pdf [file oncotarget-08-112928-s001.pdf]

## Identification of cancer prognosis-associated functional modules using differential co-expression networks

### SUPPLEMENTARY MATERIALS

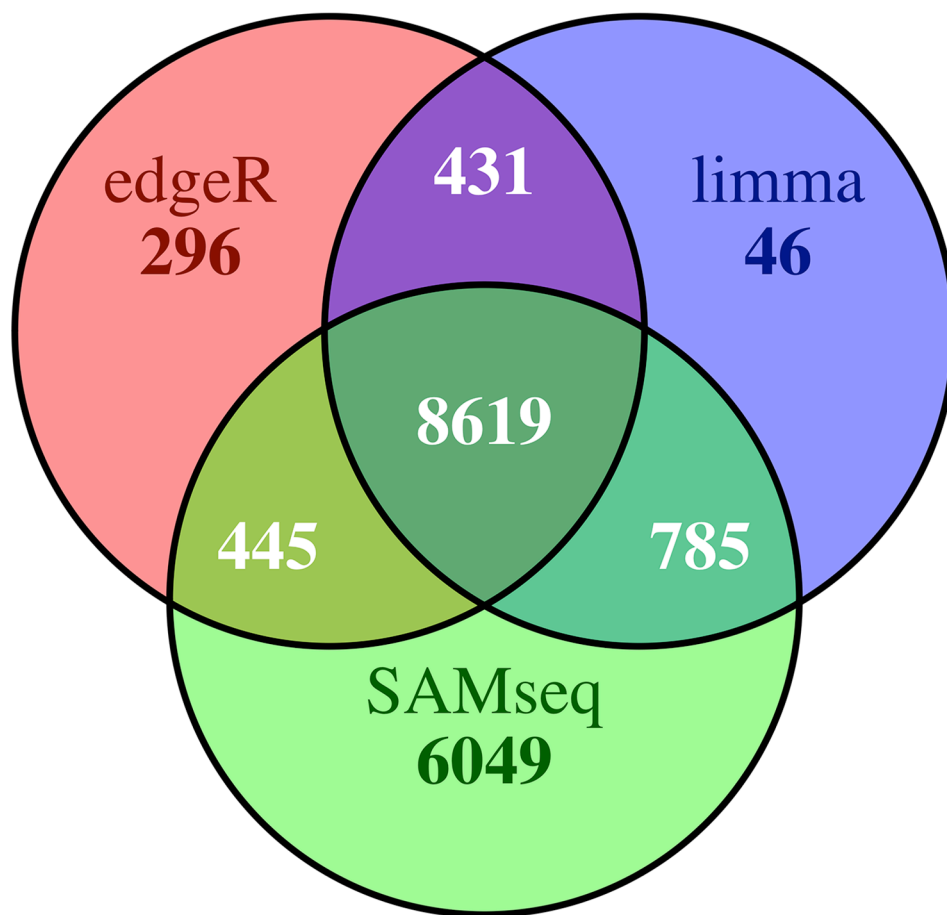

Supplementary Figure 1: Identification of differentially expressed genes for HNSC, LIHC, READ and UCEC. Venn diagram showing the overlap between differentially expressed genes selected by each method.

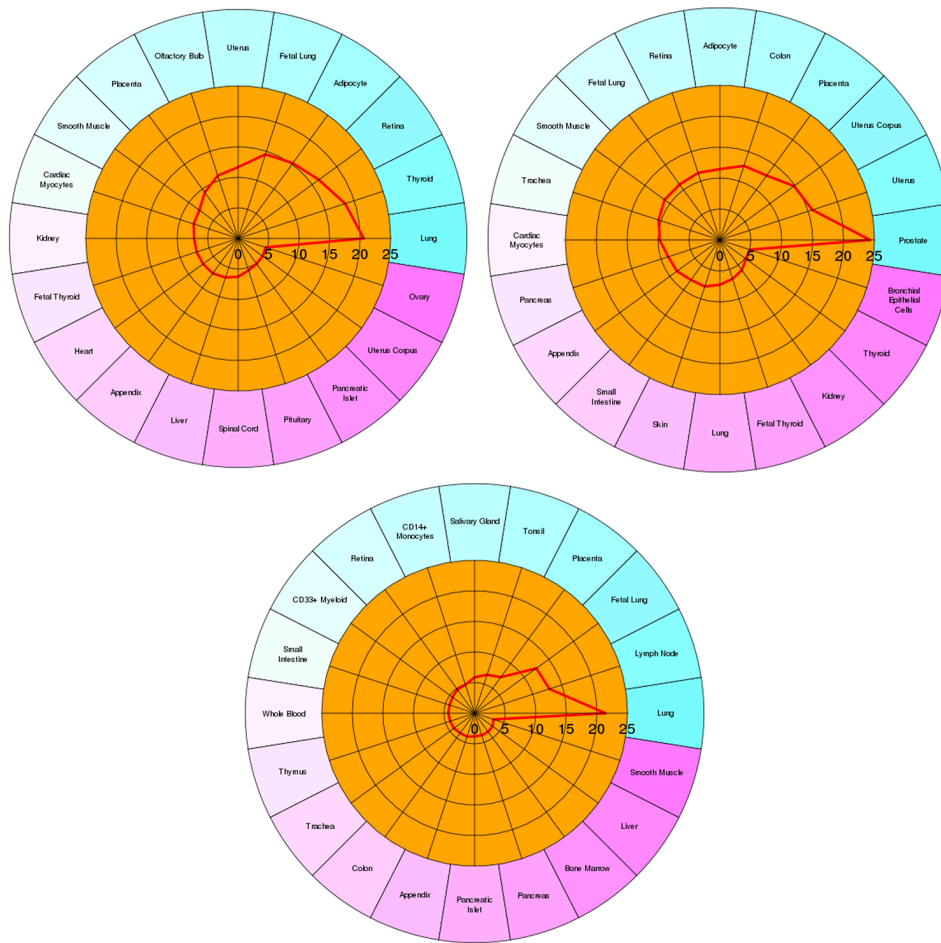

**Supplementary Figure 2: Cell type enrichment of co-expression modules.** The cell-type enrichment analysis of cluster 2 (upper left-hand corner), cluster 5 (upper right-hand corner), cluster 7 (bottom) is shown in as  $-\log_{10}$  (Benjamini-Hochberg corrected p-value).

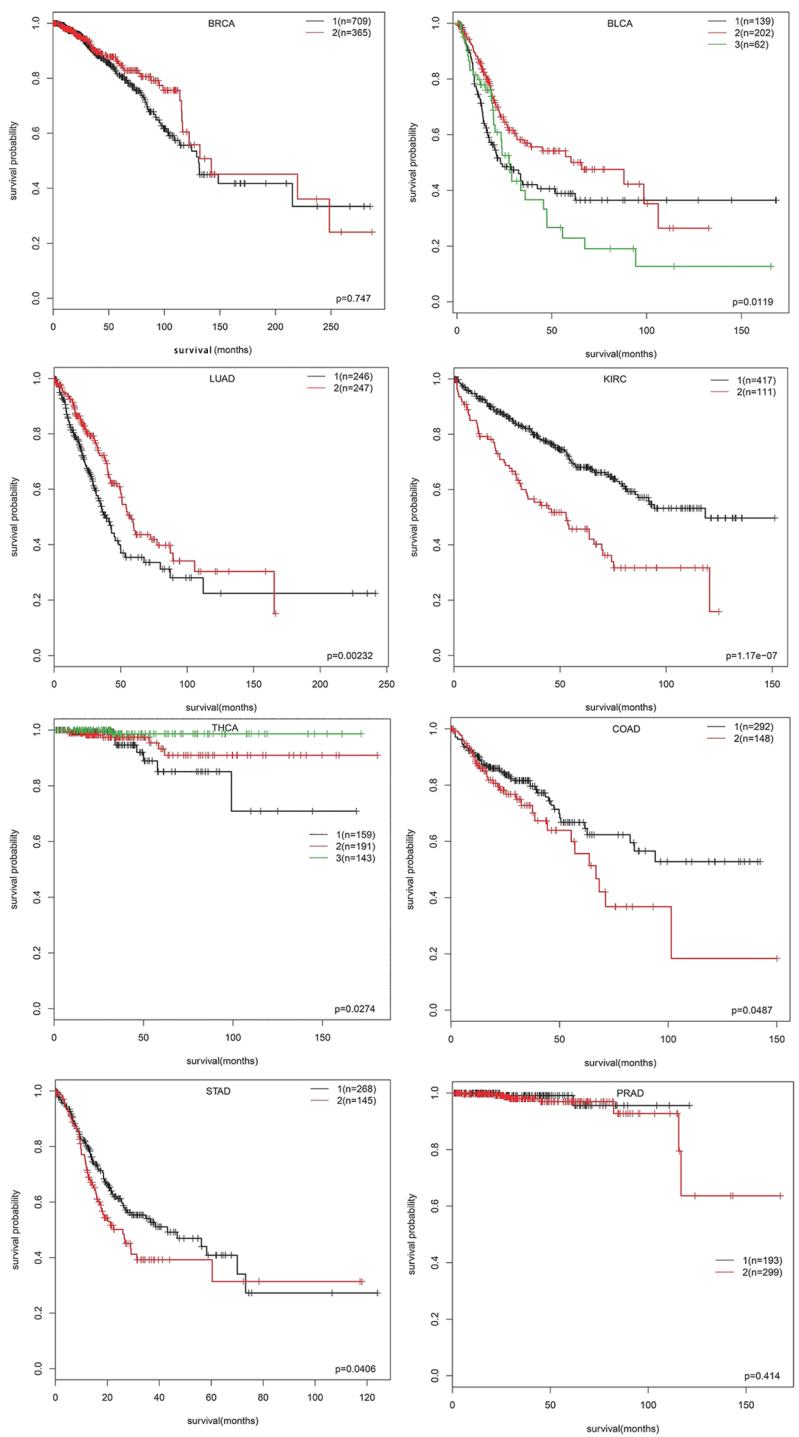

**Supplementary Figure 3: Survival analysis of the cluster 2 for 8 types of cancers.** Kaplan-Meier curves are used in survival analysis. The calculation of the log-rank p-values are based on the split of patient groups using non-negative matrix factorization. The number of patients in each group is also labeled in each panel.

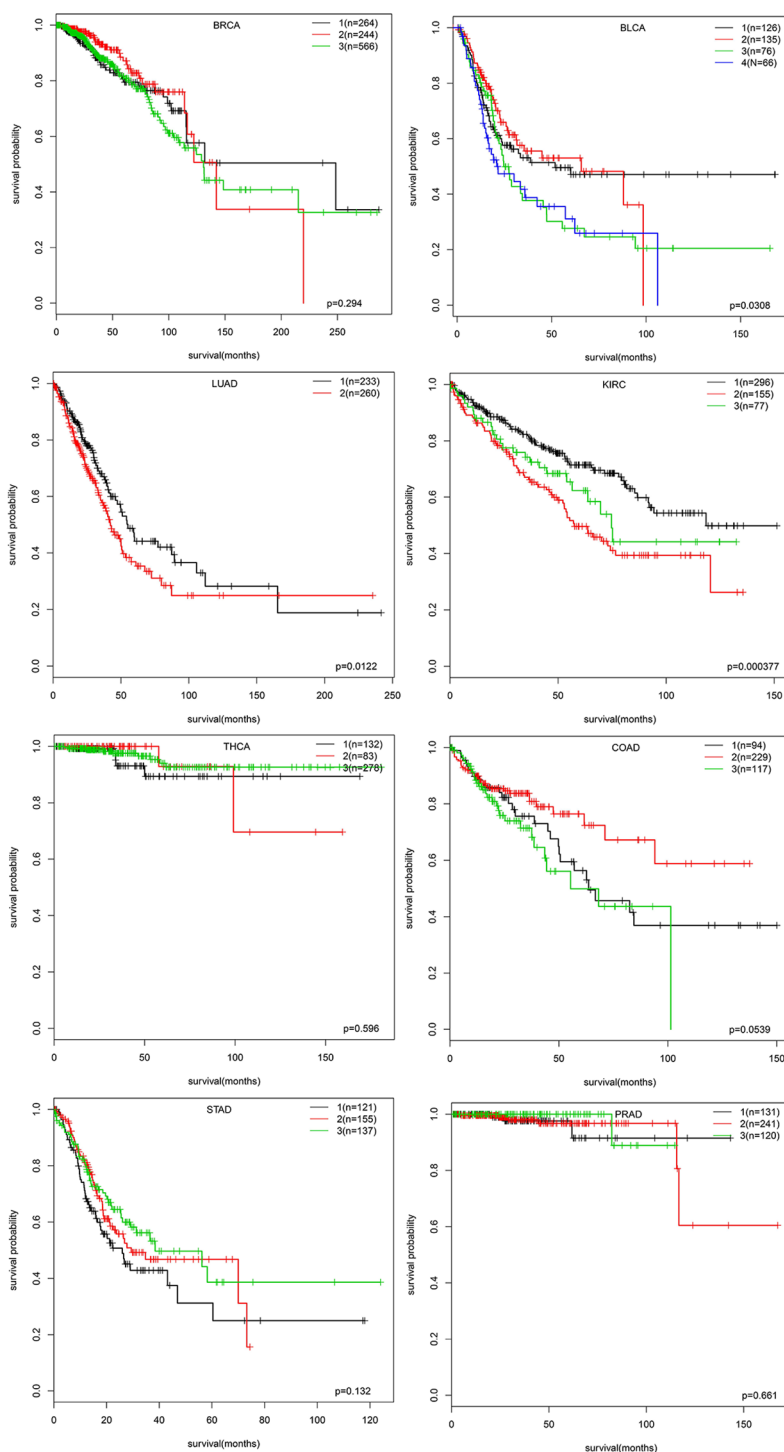

**Supplementary Figure 4: Survival analysis of the cluster 7 for 8 types of cancers.** Kaplan-Meier curves are used in survival analysis. The calculation of the log-rank p-values are based on the split of patient groups using non-negative matrix factorization. The number of patients in each group is also labeled in each panel.

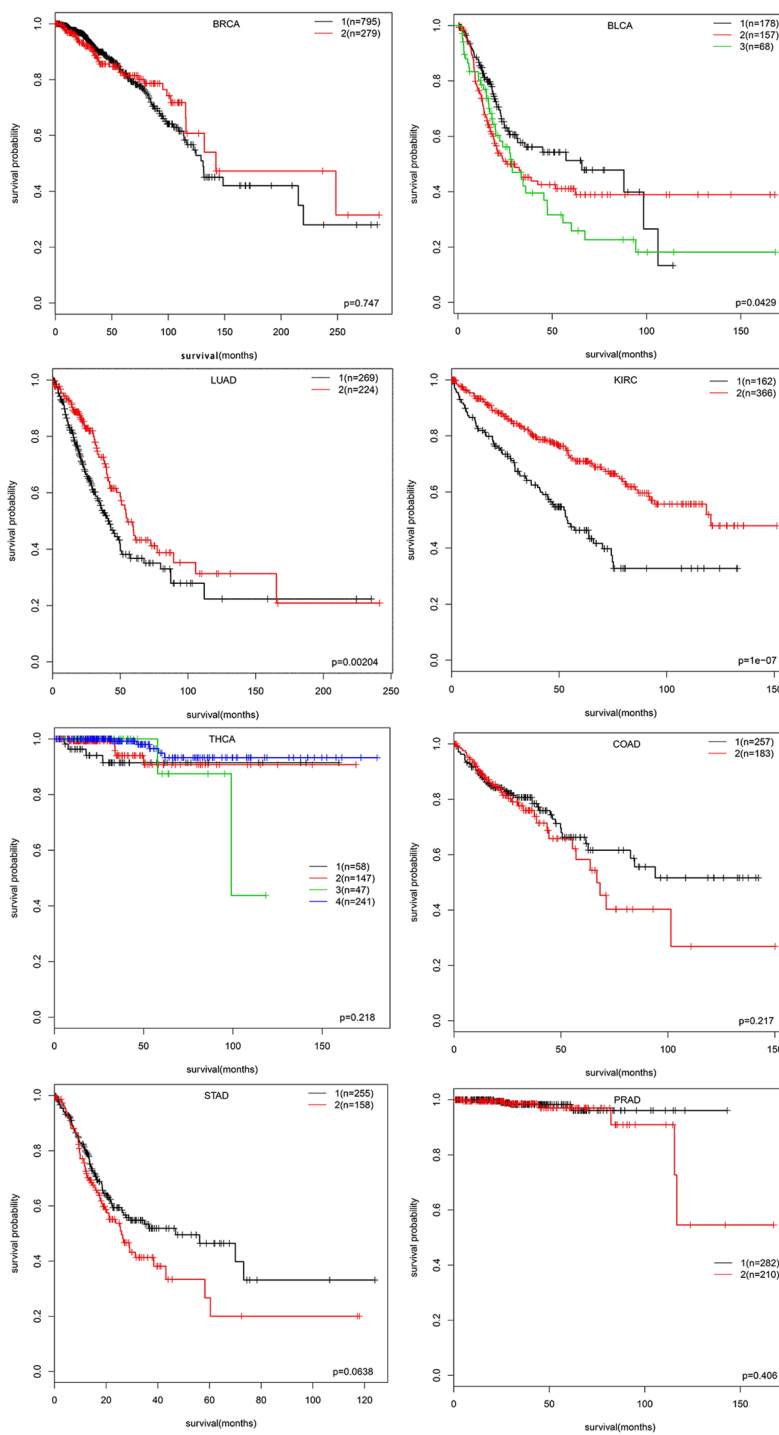

**Supplementary Figure 5: Survival analysis of the cluster 8 for 8 types of cancers.** Kaplan-Meier curves are used in survival analysis. The calculation of the log-rank p-values are based on the split of patient groups using non-negative matrix factorization. The number of patients in each group is also labeled in each panel.

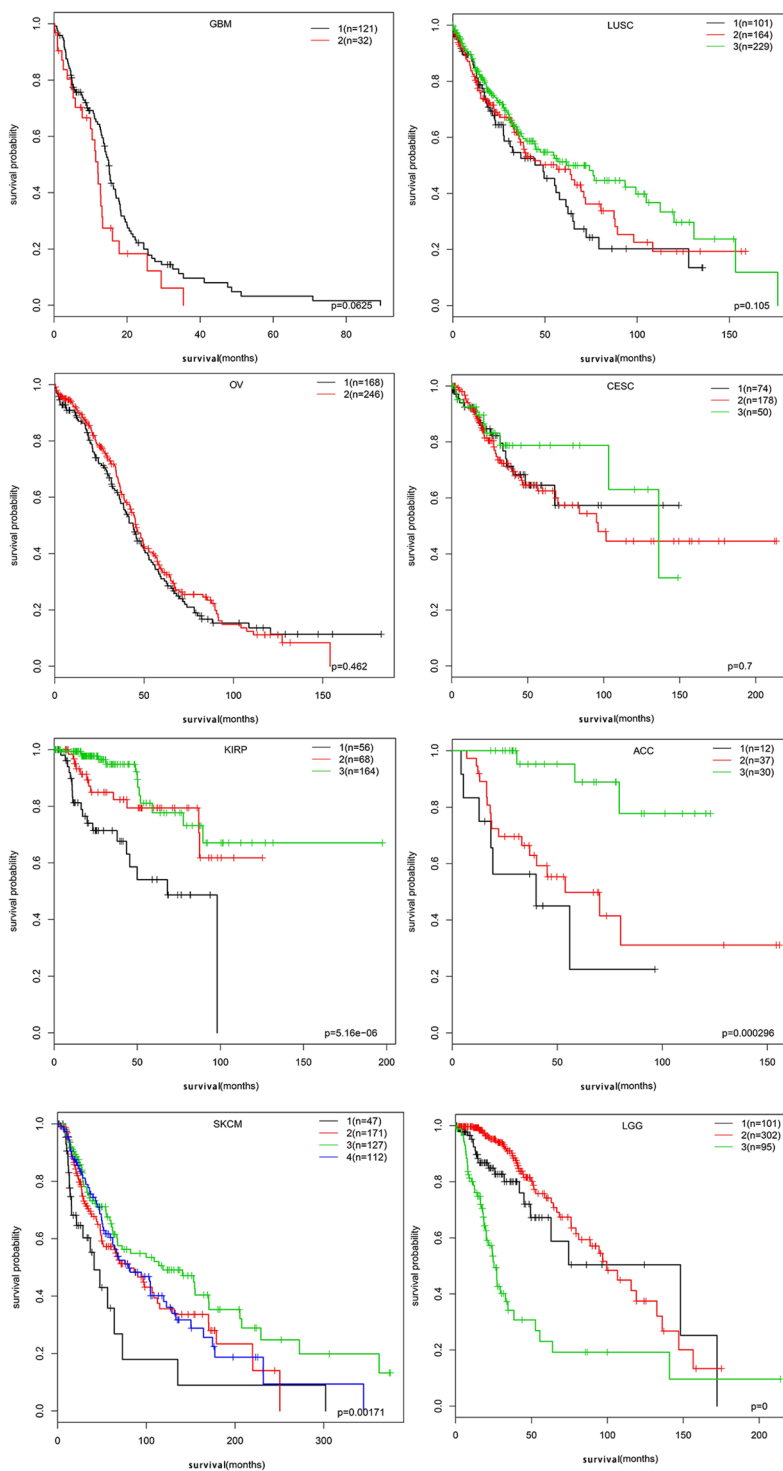

**Supplementary Figure 6: Survival analysis of the cluster 5 for other 8 types of cancers.** Kaplan-Meier curves are used in survival analysis for GBM, LUSC, OV, CESC, KIRP, ACC, SKCM and LGG. The calculation of the log-rank p-values are based on the split of patient groups using non-negative matrix factorization. The number of patients in each group is also labeled in each panel.

**Supplementary Table 1: Number of genes in the cluster as well as number of genes used in the corresponding FI network**

| <b>Module</b> | <b>Genes in the cluster</b> | <b>Genes in the FI network</b> |
|---------------|-----------------------------|--------------------------------|
| Cluster 2     | 160                         | 129                            |
| Cluster 5     | 74                          | 62                             |
| Cluster 7     | 94                          | 72                             |
| Cluster 8     | 375                         | 327                            |
| Cluster 10    | 30                          |                                |

Four clusters were identified in the eight cancer types.

**Supplementary Table 2: GO BPs of the four clusters**

See Supplementary File 1



**Supplementary Table 3: Number of genes in the cluster**

| <b>Module</b> | <b>Genes in the cluster</b> |
|---------------|-----------------------------|
| Cluster 4     | 279                         |
| Cluster 6     | 128                         |

Two clusters were identified in the four cancer types.

**Supplementary Table 4: Cell type enrichment of the four clusters. The score is  $-\log_{10}$  (Benjamini-Hochberg corrected p-value)**

See Supplementary File 2

Supplementary Table 5: The enriched diseases in the four clusters

|           | Disease                        | Benjamini-Hochberg corrected p-value |
|-----------|--------------------------------|--------------------------------------|
| Cluster 2 | Neovascularization, Pathologic | 7.23E-23                             |
|           | Neoplastic Processes           | 5.97E-22                             |
|           | Carcinoma                      | 5.97E-22                             |
|           | Neoplasms                      | 1.32E-19                             |
|           | Metaplasia                     | 3.94E-19                             |
|           | Adhesion                       | 1.93E-17                             |
|           | epithelial cancers             | 4.32E-17                             |
|           | Neoplasm Metastasis            | 4.32E-17                             |
|           | Vascular Diseases              | 4.16E-16                             |
|           | cancer or viral infections     | 1.36E-15                             |
| Cluster 5 | cancer or viral infections     | 1.17E-10                             |
|           | Neoplasms                      | 1.55E-10                             |
|           | Carcinoma                      | 5.07E-10                             |
|           | epithelial cancers             | 5.26E-10                             |
|           | Urogenital Neoplasms           | 1.18E-08                             |
|           | Collagen Diseases              | 1.59E-08                             |
|           | Chorioamnionitis               | 2.04E-08                             |
|           | Prostatic Neoplasms            | 2.65E-08                             |
|           | Neoplastic Processes           | 7.08E-08                             |
|           | Male Urogenital Diseases       | 8.39E-08                             |
| Cluster 7 | Inflammation                   | 1.68E-15                             |
|           | Immune System Diseases         | 7.12E-15                             |
|           | Chronic Disease                | 2.56E-11                             |
|           | Common Cold                    | 2.62E-11                             |
|           | Respiratory Tract Infections   | 2.62E-11                             |
|           | Autoimmune Diseases            | 3.01E-11                             |
|           | Arthritis, Rheumatoid          | 4.31E-11                             |
|           | Hypersensitivity               | 3.03E-10                             |
|           | Infection                      | 3.83E-10                             |
|           | Joint Diseases                 | 8.06E-10                             |
| Cluster 8 | Neoplastic Processes           | 4.48E-36                             |
|           | Neoplasm Metastasis            | 1.99E-31                             |
|           | cancer or viral infections     | 5.98E-30                             |
|           | Neoplasm Invasiveness          | 7.15E-29                             |
|           | Carcinoma                      | 1.44E-28                             |
|           | Neoplasms                      | 6.39E-28                             |
|           | Fibrosis                       | 4.27E-27                             |
|           | Adhesion                       | 8.04E-25                             |
|           | Collagen Diseases              | 1.02E-24                             |
|           | Adenocarcinoma                 | 9.35E-23                             |

**Supplementary Table 6: The enriched miRNAs in the four clusters**

See Supplementary File 3

**Supplementary Table 7: The enriched transcription factor targets (TFT) in the four clusters**

See Supplementary File 4



**Supplementary Table 9: The used cancer types and number of the corresponding samples**

| <b>Abbreviated cancer name</b> | <b>Tumor samples</b> | <b>Normal samples</b> |
|--------------------------------|----------------------|-----------------------|
| BRCA                           | 1119                 | 113                   |
| KIRC                           | 542                  | 72                    |
| PRAD                           | 502                  | 52                    |
| THCA                           | 513                  | 59                    |
| LUAD                           | 541                  | 59                    |
| BLCA                           | 414                  | 19                    |
| COAD                           | 483                  | 41                    |
| STAD                           | 420                  | 37                    |
| UCEC                           | 554                  | 35                    |
| HNSC                           | 504                  | 44                    |
| READ                           | 167                  | 10                    |
| LIHC                           | 374                  | 50                    |
